# Supplementary figures and images for: Comparison of the Effectiveness of High-Flow Nasal Oxygen vs. Standard Facemask Oxygenation for pre- and apneic oxygenation during Anesthesia Induction: A Systematic Review and Meta-analysis
Source: Research Square preprint supplement (doi:10.21203/rs.3.rs-888129/v1), 2021-10-08

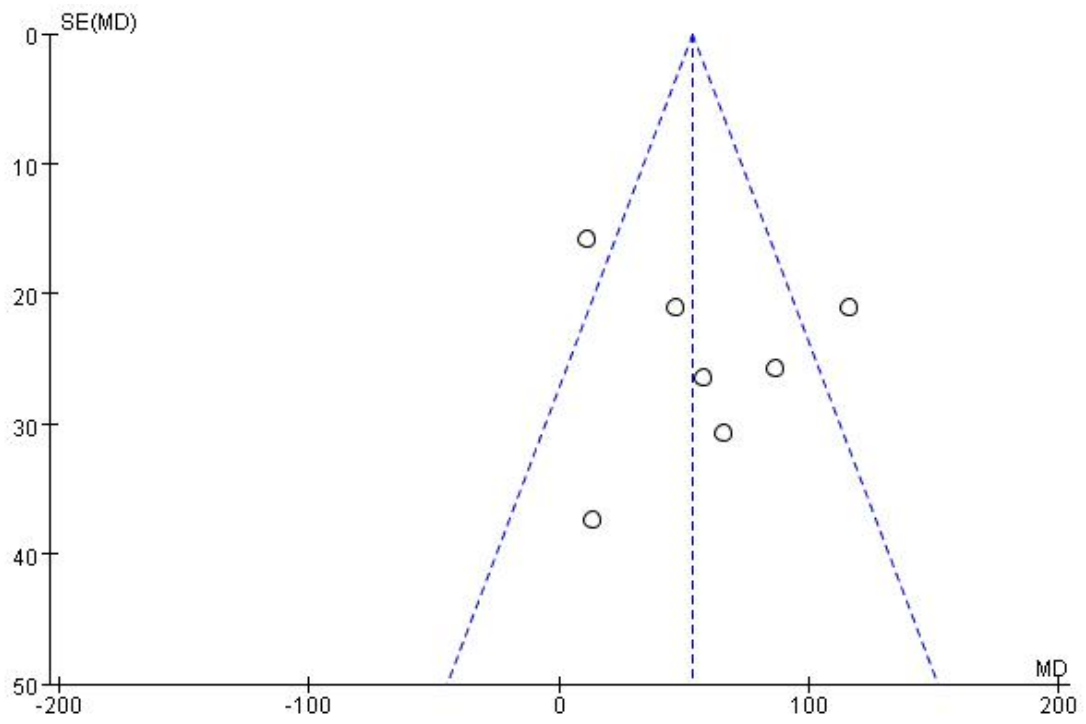

S1: Funnel plot of PaO<sub>2</sub>

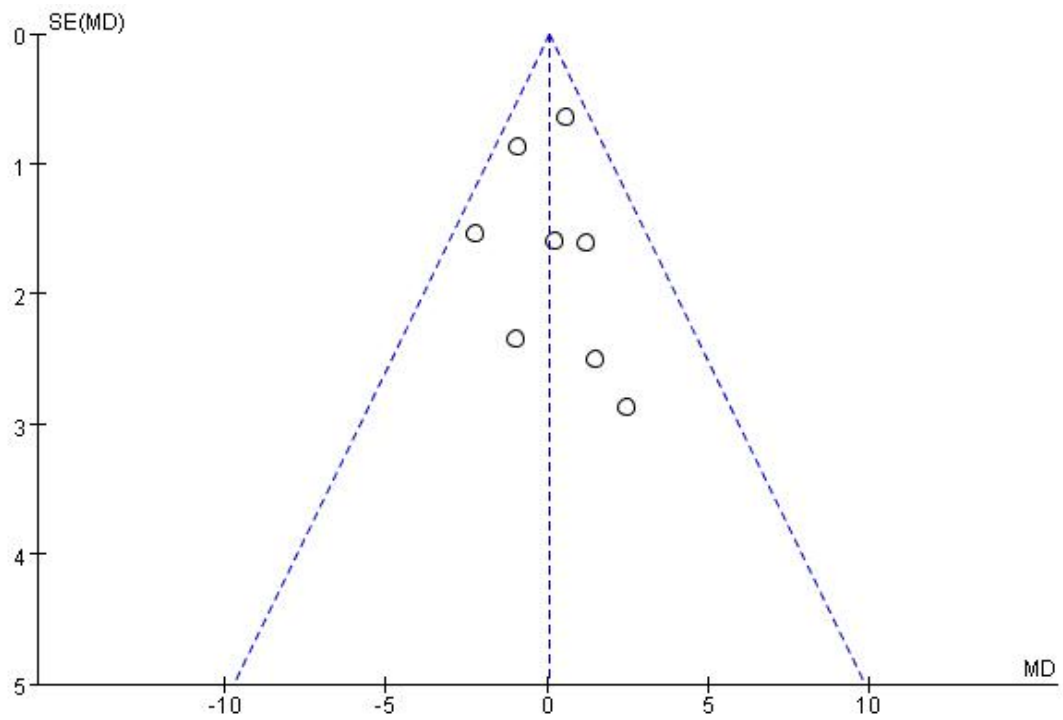

S2: Funnel plot of CO<sub>2</sub> accumulation.

Supplement: Supplementary file 1 [file e24cd594c5d99fcf1205c7ee.pdf]
